# Supplementary material for: Instructor-Blinded Study of Pharmacy Student Learning When a Flipped Online Classroom Was Implemented during the COVID-19 Pandemic
Source: MDPI journal article supplement (doi:10.3390/pharmacy10030053), 2022-05-11
Supplement: s1 [file s1]

# Evaluation of the Impact of a Flipped Classroom on Pharmacy Students' Knowledge & Confidence in Advanced Self-Care and Minor Ailment Management

## Knowledge Assessment Questions

THESE QUESTIONS ARE AIMED TO ASSESS STUDENT FACTUAL KNOWLEDGE ON SELF-CARE AND MINOR AILMENT TOPICS. THE QUESTIONS ARE BLINDED TO THE COURSE INSTRUCTOR AND WILL FOLLOW THE SELF-CONFIDENCE QUESTIONS IN THE PRE- AND POST-COURSE ASSESSMENT SURVEY.

**1. What is the most appropriate recommendation regarding breastfeeding for HIV-infected mothers?**

- A. Do not breastfeed your infant
- B. You may practice breastfeeding if the viral load in your blood is undetectable
- C. You may breastfeed freely as there is no risk of HIV transmission through breast milk

**2. To what extent can you recommend calorie restriction to achieve weight loss without close medical supervision?**

- A. Limit caloric intake to 1800 kcal/day
- B. Limit caloric intake to 1500 kcal/day
- C. Limit caloric intake to 1200 kcal/day
- D. Limit caloric intake to 800 kcal/day
- E. Limit caloric intake to 400 kcal/day

**3. Which minor ailment typically presents with an acidic pH in the vagina?**

- A. Vulvovaginal candidiasis
- B. Atrophy
- C. Bacterial vaginosis
- D. Trichomoniasis

**4. Which Non-Steroidal Anti-Inflammatory drug (NSAID) poses the lowest risk for gastrointestinal adverse events, such as ulcers or gastrointestinal bleeding?**

- A. Diclofenac
- B. Naproxen
- C. Ibuprofen
- D. Indomethacin
- E. Celecoxib

**5. Which Non-Steroidal Anti-Inflammatory drug (NSAID) poses the lowest risk for cardiovascular adverse events, such as myocardial infarction and stroke?**

- A. Diclofenac

B. Naproxen

C. Ibuprofen

D. Indomethacin

E. Celecoxib

**6. When treating atopic dermatitis, how long is an appropriate trial for a topical corticosteroid before an alternative agent should be considered?**

A. Two weeks

B. One month

C. Three months

D. Six months

**7. Which of the following would NOT be classified as a “red flag” warranting referral for assessment by a physician in the context of low back pain?**

A. Immunosuppression

B. Bladder dysfunction

C. Persistent leg weakness

D. Age < 30 years

**8. Which of the following options is a recommended treatment for constipation-predominant irritable bowel syndrome?**

A. Align probiotics

B. Citalopram

C. Amitriptyline

D. Lactulose

**9. Which of the following non-prescription products is a first line agent for treating nausea and vomiting in the first 6 weeks of pregnancy?**

A. Dimenhydrinate tablets

B. TUMS chewable tablets

C. Vitamin B6 tablets

D. Gravol ginger tablets

**10. Which of the following types of infant formulas is the MOST appropriate for an infant with an allergy to cow’s milk?**

A. Soy-based

B. Extensively hydrolyzed

C. Partially hydrolyzed

D. Lactose free

**11. Which of the following agents may be used to treat both Bacterial Vaginosis AND Trichomoniasis?**

- A. Metronidazole oral capsules
- B. Metronidazole topical gel
- C. Clindamycin topical cream
- D. All of the above

**12. What is the first line treatment for a painful external hordeolum that appeared 24 hours ago?**

- A. Warm compresses
- B. Steroid injections
- C. Topical antibiotics
- D. Oral antibiotics

**13. When the luteinizing hormone surge is detected by an ovulation test or fertility kit, ovulation will likely occur in the next:**

- A. 6-12 hours
- B. 12-48 hours
- C. 48-72 hours
- D. 5 days

**14. Which of the following non-prescription products does not have restrictions for use in the elderly?**

- A. Diphenhydramine
- B. Methocarbamol
- C. Dimenhydrinate
- D. Bisacodyl

**15. Which of the following products is NOT effective as an analgesic in pharyngitis?**

- A. Peridex
- B. Tantum
- C. Cepacol
- D. Chloraseptic

**16. Which patient is most likely to be presenting with bacterial pharyngitis?**

- A. A six-year-old female complains of sore throat but no cough and no fever
- B. A fifty-year-old male complains of sore throat with cough and fever
- C. A sixteen-year-old male complains of sore throat with cough and fever
- D. A fifty-year-old female complains of sore throat with fever and rhinitis but no cough

**17. Which of the following is NOT a typical symptom of cystitis?**

- A. Fever

- B. Urinary urgency
- C. Dysuria
- D. Suprapubic pain

**18. When using a rapid antigen detection test (RADT) to test for bacterial pharyngitis in a child, which results require confirmation with culture?**

- A. Positive results
- B. Negative results
- C. Both positive and negative results
- D. None

**19. In sports-related injuries, which symptom DOES NOT require immediate referral for medical attention?**

- A. Headache
- B. Joint swelling
- C. Blurred vision
- D. Nausea

**20. Which of the following topical antibacterials is NOT a first line agent for treating superficial, mildly infected wounds?**

- A. Fucidin (fusidic acid)
- B. Bactroban (mupirocin)
- C. Flamazine (silver sulfadiazine)
- D. Polysporin (bacitracin and polymixin B)

## Unique Identifier

**Please enter the LAST FOUR digits of your student number as a unique identifier**

*e.g., 2561; this identifier will be used to correlate your pre- and post-course results*

---
